# Supplementary material for: Ab initio study of Li, Mg and Al insertion into rutile VO2: fast diffusion and enhanced voltages for multivalent batteries
Source: Royal Society of Chemistry journal article supplement (doi:10.1039/c7cp04360k), 2017-01-01
Supplement: c7cp04360k1.pdf [file c7cp04360k1.pdf]

# Ab initio study of Li, Mg and Al insertion into rutile VO<sub>2</sub>: Fast diffusion and enhanced voltages for multivalent batteries

Vadym V. Kulish, Daniel Koch and Sergei Manzhos\*

Department of Mechanical Engineering, National University of Singapore, Block EA #07-08,  
9 Engineering Drive 1, Singapore 117576

E-mail: mpemanzh@nus.edu.sg (S. Manzhos)

## Supporting information

**Table S1.** Relative total energies (in meV per formula unit) of FM and AFM VO<sub>2</sub> and Li-VO<sub>2</sub>. Zero energy is referenced to FM state

|     | VO <sub>2</sub> | Li <sub>0.33</sub> VO <sub>2</sub> | Li <sub>0.5</sub> VO <sub>2</sub> | LiVO <sub>2</sub> |
|-----|-----------------|------------------------------------|-----------------------------------|-------------------|
| FM  | 0               | 0                                  | 0                                 | 0                 |
| AFM | +45             | +43                                | +53                               | +52               |

**Table S2.** Voltage for Li insertion in rutile and monoclinic phases of VO<sub>2</sub>

| Composition                        | $V$ (V)<br>(rutile) | $V$ (V)<br>(monoclinic) |
|------------------------------------|---------------------|-------------------------|
| Li <sub>0.03</sub> VO <sub>2</sub> | -3.50               | -3.27                   |
| Li <sub>0.25</sub> VO <sub>2</sub> | -2.81               | -2.59                   |
